# Supplementary material
Source: MDPI journal article supplement (https://www.mdpi.com/2306-5710/3/1/7)
Supplement: s1 [file s1]

# Supplementary Materials: The Impact of Wine Style and Sugar Addition in *liqueur d'expedition (dosage)* Solutions on Traditional Method Sparkling Wine Composition

Belinda Kemp, Casey Hogan, Shufen Xu, Lisa Dowling and Debbie Inglis

**Table S1.** Chemical composition of ZD sparkling wines: 5 and 10 weeks post-disgorging. All values are representative means of triplicate measurements  $\pm$  standard deviation of the means.

| WINE                        | 5 WEEKS         | 10 WEEKS        |
|-----------------------------|-----------------|-----------------|
| pH                          | 3.06 $\pm$ 0.02 | 3.03 $\pm$ 0.01 |
| Titrateable acidity (g/L)   | 8.2 $\pm$ 0.2   | 8.5 $\pm$ 0.1   |
| Residual sugar (g/L)        | 0.8 $\pm$ 0.1   | 0.8 $\pm$ 0.1   |
| Alcohol (% <i>v/v</i> )     | 12.3 $\pm$ 0.1  | 12.3 $\pm$ 0.1  |
| Free SO <sub>2</sub> (ppm)  | 9 $\pm$ 1       | 5 $\pm$ 1       |
| Total SO <sub>2</sub> (ppm) | 78 $\pm$ 5      | 57 $\pm$ 5      |
| Total phenolics (AU)        | 2.68 $\pm$ 0.43 | 1.93 $\pm$ 0.51 |

**Table S2.** Chemical composition of BS sparkling wines: 5 and 10 weeks post-disgorging. All values are representative means of triplicate measurements  $\pm$  standard deviation of the means.

| WINE                        | 5 WEEKS         | 10 WEEKS        |
|-----------------------------|-----------------|-----------------|
| pH                          | 3.05 $\pm$ 0.02 | 3.04 $\pm$ 0.01 |
| Titrateable acidity (g/L)   | 8.4 $\pm$ 0.1   | 8.7 $\pm$ 0.1   |
| Residual sugar (g/L)        | 6.0 $\pm$ 0.1   | 6.6 $\pm$ 0.1   |
| Alcohol (% <i>v/v</i> )     | 12.2 $\pm$ 0.1  | 12.2 $\pm$ 0.1  |
| Free SO <sub>2</sub> (ppm)  | 9 $\pm$ 1       | 5 $\pm$ 1       |
| Total SO <sub>2</sub> (ppm) | 70 $\pm$ 3      | 57 $\pm$ 6      |
| Total phenolics (AU)        | 1.98 $\pm$ 0.05 | 1.88 $\pm$ 0.22 |

**Table S3.** Chemical composition of OC sparkling wines: 5 and 10 weeks post-disgorging. All values are representative means of triplicate measurements  $\pm$  standard deviation of the means.

| WINE                        | 5 WEEKS         | 10 WEEKS        |
|-----------------------------|-----------------|-----------------|
| pH                          | 3.07 $\pm$ 0.01 | 3.02 $\pm$ 0.01 |
| Titrateable acidity (g/L)   | 8.5 $\pm$ 0.1   | 8.3 $\pm$ 0.1   |
| Residual sugar (g/L)        | 7.2 $\pm$ 0.2   | 6.7 $\pm$ 0.2   |
| Alcohol (% <i>v/v</i> )     | 12.3 $\pm$ 0.1  | 12.3 $\pm$ 0.1  |
| Free SO <sub>2</sub> (ppm)  | 9 $\pm$ 1       | 5 $\pm$ 1       |
| Total SO <sub>2</sub> (ppm) | 77 $\pm$ 2      | 54 $\pm$ 1      |
| Total phenolics (AU)        | 1.84 $\pm$ 0.17 | 2.09 $\pm$ 0.33 |

**Table S4.** Chemical composition of UC sparkling wines: 5 and 10 weeks post-disgorging. All values are representative means of triplicate measurements  $\pm$  standard deviation of the means.

| WINE                        | 5 WEEKS         | 10 WEEKS        |
|-----------------------------|-----------------|-----------------|
| pH                          | 3.06 $\pm$ 0.01 | 3.04 $\pm$ 0.02 |
| Titrateable acidity (g/L)   | 8.3 $\pm$ 0.2   | 8.4 $\pm$ 0.1   |
| Residual sugar (g/L)        | 6.3 $\pm$ 0.1   | 6.9 $\pm$ 0.1   |
| Alcohol (% <i>v/v</i> )     | 12.2 $\pm$ 0.1  | 12.2 $\pm$ 0.1  |
| Free SO <sub>2</sub> (ppm)  | 8 $\pm$ 1       | 4 $\pm$ 1       |
| Total SO <sub>2</sub> (ppm) | 84 $\pm$ 3      | 50 $\pm$ 1      |
| Total phenolics (AU)        | 1.70 $\pm$ 0.14 | 1.92 $\pm$ 0.56 |

**Table S5.** Chemical composition of PN sparkling wines: 5 and 10 weeks post-disgorging. All values are representative means of triplicate measurements  $\pm$  standard deviation of the means.

| WINE                        | 5 WEEKS         | 10 WEEKS        |
|-----------------------------|-----------------|-----------------|
| pH                          | 3.07 $\pm$ 0.01 | 3.07 $\pm$ 0.01 |
| Titrateable acidity (g/L)   | 8.3 $\pm$ 0.1   | 8.3 $\pm$ 0.1   |
| Residual sugar (g/L)        | 6.7 $\pm$ 0.1   | 6.4 $\pm$ 0.1   |
| Alcohol (% <i>v/v</i> )     | 12.2 $\pm$ 0.1  | 12.2 $\pm$ 0.1  |
| Free SO <sub>2</sub> (ppm)  | 6 $\pm$ 1       | 4 $\pm$ 1       |
| Total SO <sub>2</sub> (ppm) | 65 $\pm$ 2      | 49 $\pm$ 2      |
| Total phenolics (AU)        | 1.58 $\pm$ 0.04 | 2.12 $\pm$ 0.22 |

**Table S6.** Chemical composition of IW sparkling wines: 5 and 10 weeks post-disgorging. All values are representative means of triplicate measurements  $\pm$  standard deviation of the means.

| WINE                        | 5 WEEKS         | 10 WEEKS        |
|-----------------------------|-----------------|-----------------|
| pH                          | 3.05 $\pm$ 0.02 | 3.07 $\pm$ 0.01 |
| Titrateable acidity (g/L)   | 8.4 $\pm$ 0.5   | 8.2 $\pm$ 0.2   |
| Residual sugar (g/L)        | 6.1 $\pm$ 0.3   | 6.4 $\pm$ 0.1   |
| Alcohol (% <i>v/v</i> )     | 12.2 $\pm$ 0.1  | 12.2 $\pm$ 0.1  |
| Free SO <sub>2</sub> (ppm)  | 6 $\pm$ 1       | 4 $\pm$ 1       |
| Total SO <sub>2</sub> (ppm) | 66 $\pm$ 1      | 51 $\pm$ 4      |
| Total phenolics (AU)        | 2.28 $\pm$ 0.77 | 1.81 $\pm$ 0.20 |

**Table S7.** Chemical composition of B sparkling wines: 5 and 10 weeks post-disgorging. All values are representative means of triplicate measurements  $\pm$  standard deviation of the means.

| WINE                        | 5 WEEKS         | 10 WEEKS        |
|-----------------------------|-----------------|-----------------|
| pH                          | 3.00 $\pm$ 0.01 | 3.06 $\pm$ 0.01 |
| Titrateable acidity (g/L)   | 8.3 $\pm$ 0.2   | 8.4 $\pm$ 0.3   |
| Residual sugar (g/L)        | 7.5 $\pm$ 0.1   | 7.0 $\pm$ 0.2   |
| Alcohol (% <i>v/v</i> )     | 12.9 $\pm$ 0.1  | 12.9 $\pm$ 0.1  |
| Free SO <sub>2</sub> (ppm)  | 10 $\pm$ 1      | 4 $\pm$ 1       |
| Total SO <sub>2</sub> (ppm) | 73 $\pm$ 2      | 48 $\pm$ 2      |
| Total phenolics (AU)        | 1.76 $\pm$ 0.03 | 1.95 $\pm$ 0.24 |
